# Supplementary material for: Rational Design of Nitrogen-Doped Carbon Dots for Inhibiting β-Amyloid Aggregation
Source: MDPI journal article supplement (doi:10.3390/molecules28031451), 2023-02-02
Supplement: s1 [file s1]

## Supporting Information

# Rational Design of Nitrogen-Doped Carbon Dots for Inhibiting $\beta$ -Amyloid Aggregation

Hong Liu <sup>1,†</sup>, Huazhang Guo <sup>2,†</sup>, Yibin Fang <sup>3,\*</sup>, Liang Wang <sup>2,\*</sup> and Peng Li <sup>3,\*</sup>

<sup>1</sup> Department of Neurology, Shanghai East Hospital, Tongji University School of Medicine, Shanghai 200120, China

<sup>2</sup> Institute of Nanochemistry and Nanobiology, School of Environmental and Chemical Engineering, Shanghai University, Shanghai 200444, China

<sup>3</sup> Department of Neurovascular, Shanghai Fourth People's Hospital, Tongji University School of Medicine, Shanghai 200434, China

\* Correspondence: 13585831041@163.com (Y.F.); wangl@shu.edu.cn (L.W.); 15921196270@126.com (P.L.)

† These authors contributed equally to this work.

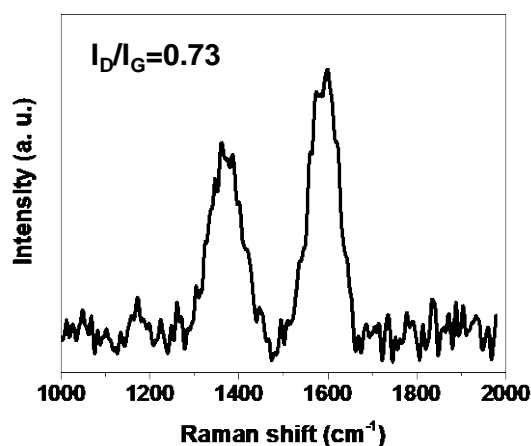

Figure S1. Raman spectrum of N-CDs.
